# Supplementary material
Source: publisher figshare collection journal article supplement (https://gsapubs.figshare.com/articles/dataset/_/12535778)
Supplement: Supplementary file 1 [file 1]

GSA Data Repository Item 2017367

Anderson, P.E., Stevenson, C.T., Cooper, M.R., Meighan, I.G., Reavy, R.J., Hurley, C.T., Inman, J., and Ellam, R.M., 2017, Refined model of incremental emplacement based on structural evidence from the granodioritic Newry igneous complex, Northern Ireland: GSA Bulletin, <https://doi.org/10.1130/B31734.1>.

## **DATA REPOSITORY**

Appendix 1. Sample localities within the NIC and satellite bodies. Many of the same localities are used for geochemical sampling (Anderson et al., 2016).

Appendix 2. Locality information and structural data from the NIC, satellite bodies and host rocks.

Appendix 3. AMS fabric data from the NIC and satellite bodies.

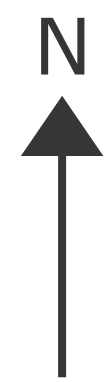

Appendix 1: Sample localities (also includes those used for geochemical study by Anderson et al. (2016))

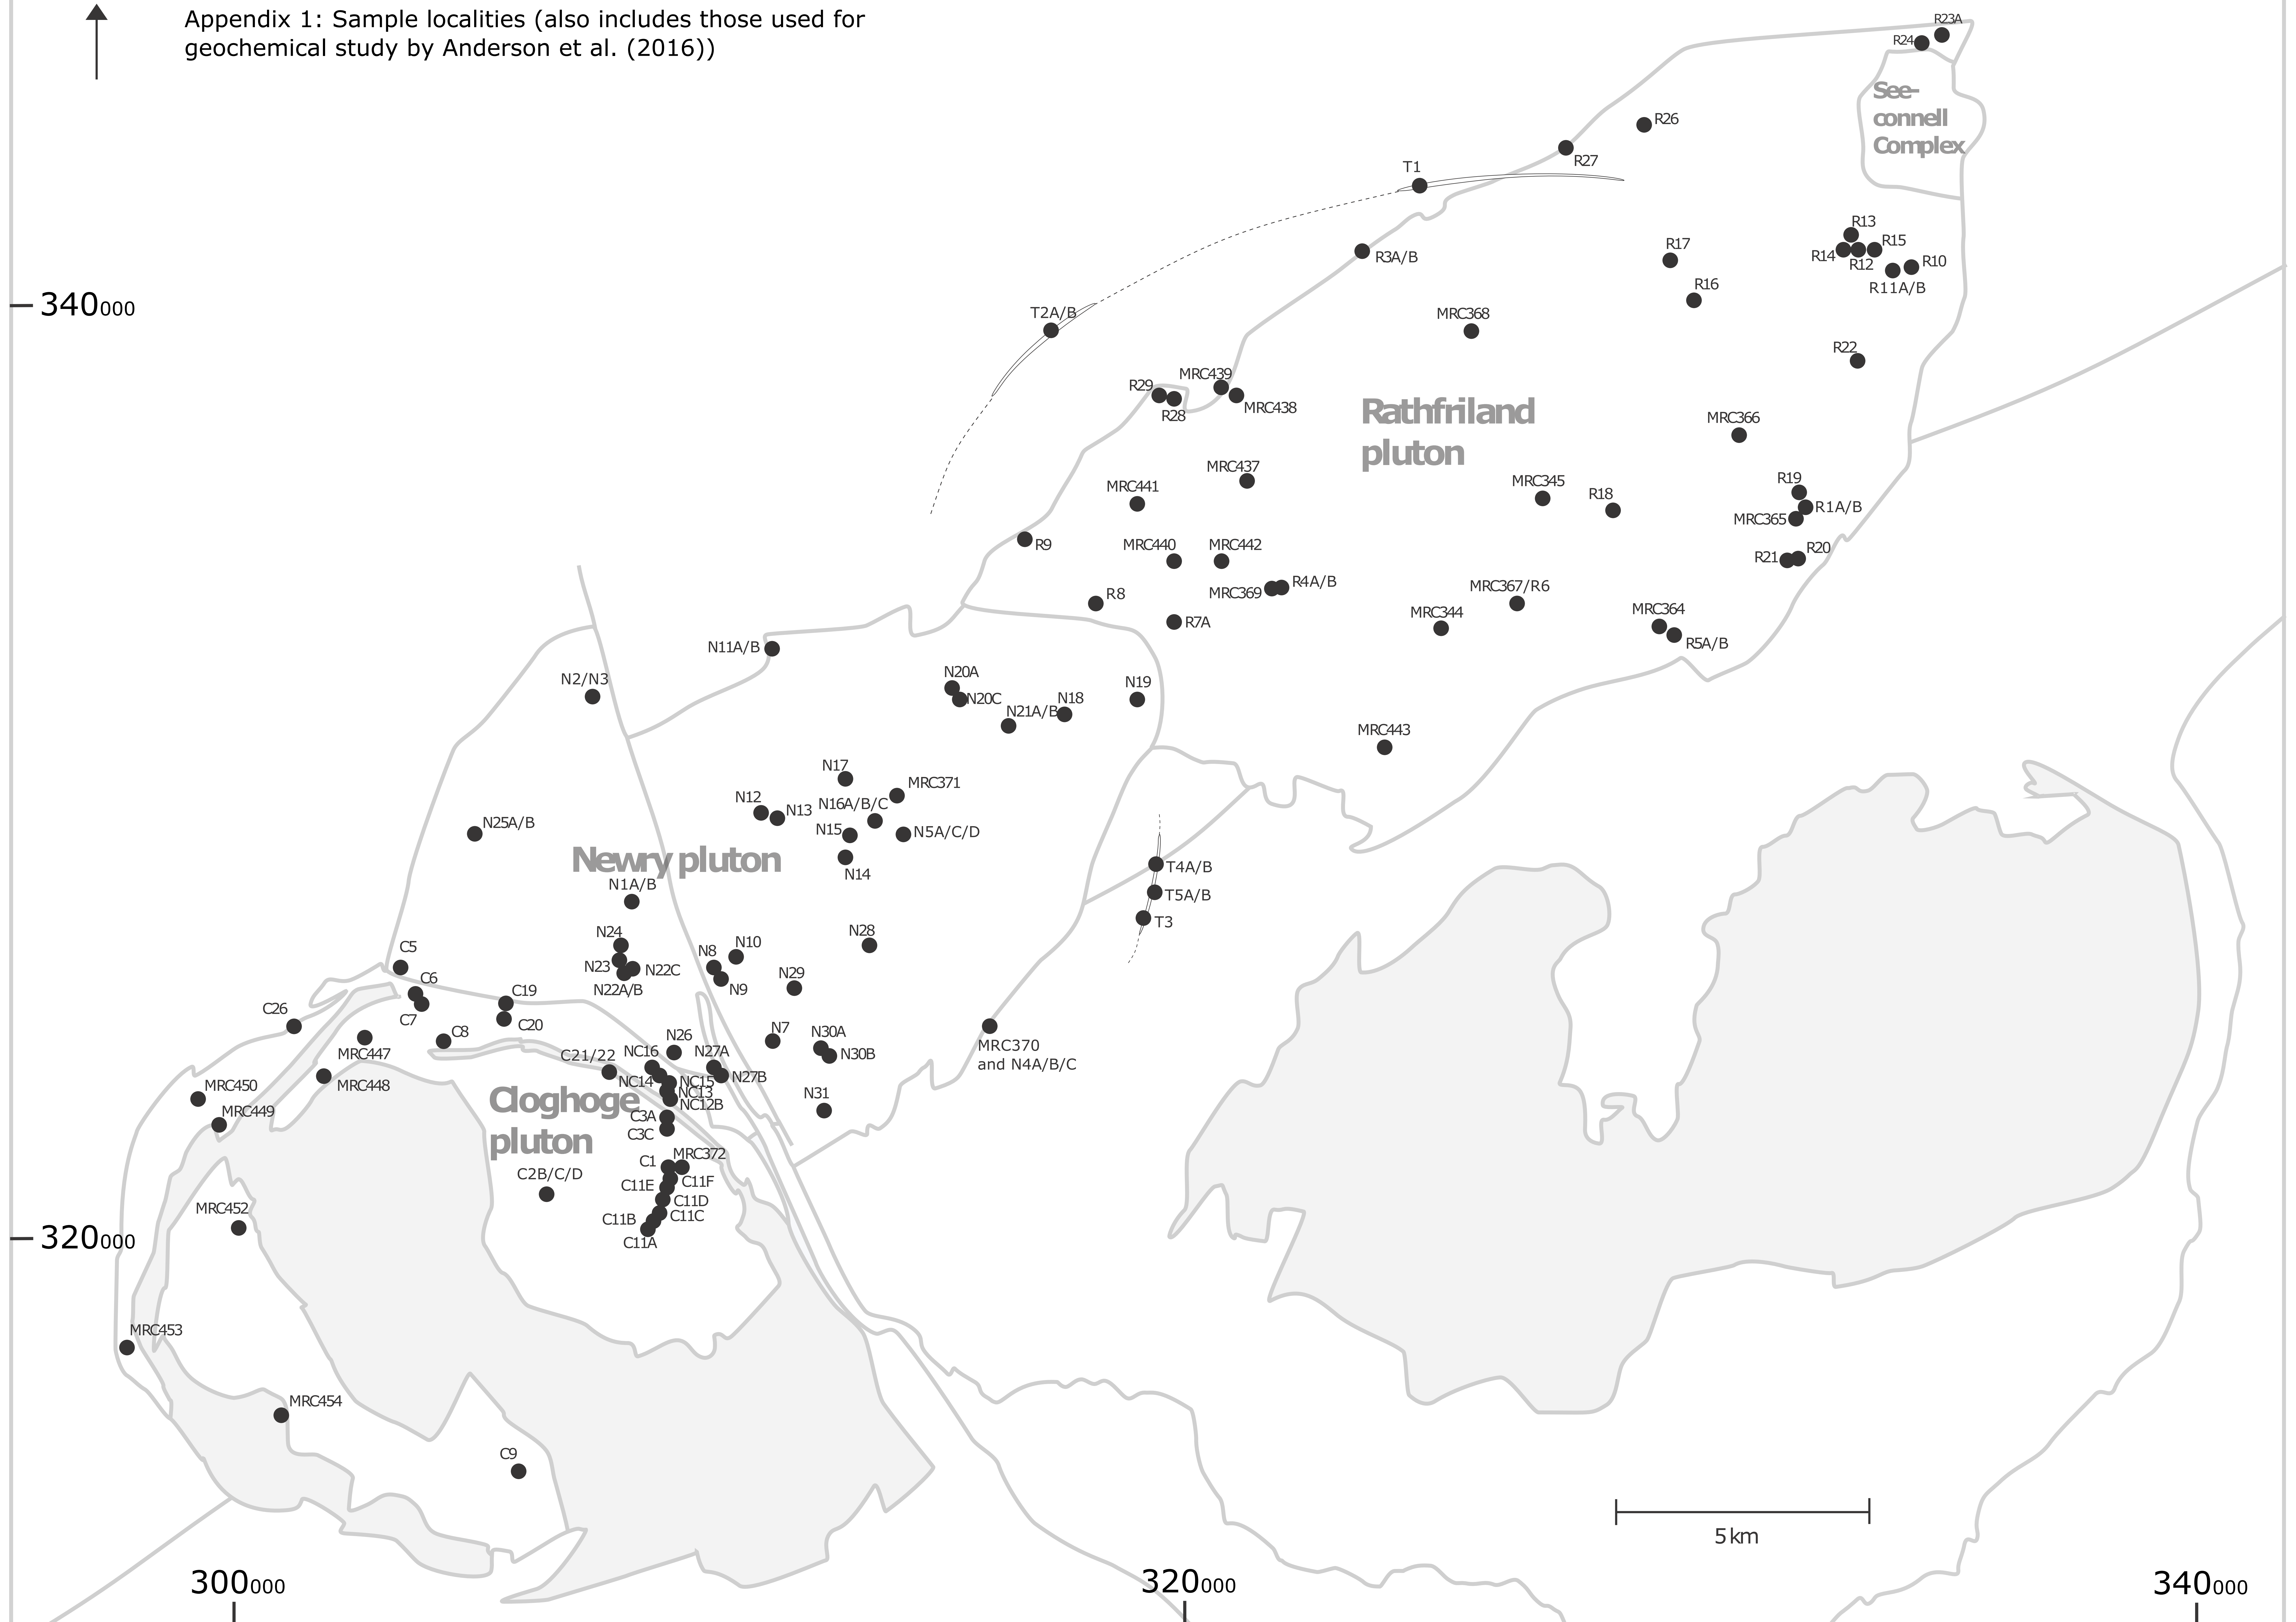

# Appendix 2: locality information and field data

Key to abbreviations: Gd = granodiorite Di = diorite Qtz = quartz  
Lampro = lamprophyre Bt = biotite Peg = pegmatite  
H.rock = host rock Hb = hornblende Mobil = mobilised

| Locality |                 |              |                      |         |          | Sample                        |               |                   | Structural data              |                      |        |           |                  |
|----------|-----------------|--------------|----------------------|---------|----------|-------------------------------|---------------|-------------------|------------------------------|----------------------|--------|-----------|------------------|
| Loc. No. | Hurley Loc. No. | GSNI site    | Irish Grid reference |         |          | Locality Name (if applicable) | Sample number | GSNI sample no.   | Lithology                    | Measurement type     | Strike | Dip       | Direction of dip |
|          |                 |              | Grid                 | Easting | Northing |                               |               |                   |                              |                      |        |           |                  |
| 1        |                 |              | J                    | 32634   | 42114    | Ballymagreehan Quarry         | R1A<br>R1B    | MRC 365<br>MRC 60 | Bt pyroxenite<br>melodiorite |                      |        |           |                  |
| 2        |                 | GSNI<br>GSNI | J                    | 30431   | 35453    |                               |               |                   | Gd                           |                      |        |           |                  |
|          |                 |              | J                    | 30444   | 35453    |                               |               |                   | Gd                           |                      |        |           |                  |
|          |                 |              | J                    | 3045    | 3545     |                               |               |                   | Di enclave                   |                      |        |           |                  |
|          |                 |              | J                    | 304     | 354      |                               |               |                   |                              |                      |        |           |                  |
|          |                 |              | J                    | 306     | 364      |                               |               |                   | Gd                           | Mineral foliation    | 10     | 65        | SE               |
|          |                 |              | J                    | 306     | 364      |                               |               |                   | Gd                           | Mineral foliation    | 20     | 70        | SE               |
|          |                 |              | J                    | 306     | 364      |                               |               |                   | Gd                           | Mineral foliation    | 178    | 8         | E                |
|          |                 |              | J                    | 306     | 364      |                               |               |                   | Lampro dyke                  | Dyke Contact         | 79     | 90        | N                |
|          | 190             |              | J                    | 307     | 366      |                               |               |                   | Coarse Gd                    | Mineral foliation    | 26     | 70        | S                |
|          |                 |              | J                    | 307     | 366      |                               |               |                   | Coarse Gd-Fine Gd            | Internal Contact     | 26     | 60        | S                |
|          |                 |              | J                    | 307     | 366      |                               |               |                   | Coarse Gd-Fine Gd            | Internal Contact     | 25     | 40        | S                |
| 3        |                 | MRC 366      | J                    | 2927    | 3694     | Magheramayo                   |               | MRC 366           | Gd                           |                      |        |           |                  |
|          | 213             |              | J                    | 296     | 439      |                               |               |                   | Lampro dyke                  | Dyke Contact         | 120    | -         |                  |
|          |                 |              | J                    | 296     | 439      |                               |               |                   | Gd                           | Mineral foliation    | 40     | 60        | E                |
|          |                 |              | J                    | 296     | 439      |                               |               |                   | Gd                           | Mineral foliation    | 25     | 70        | E                |
|          |                 |              | J                    | 296     | 439      |                               |               |                   | Gd                           | Mineral foliation    | 160    | 60        | E                |
| 5        |                 |              | J                    | 20062   | 33973    | Rathfriland Centre Quarry     | R4A<br>R4B    |                   | Coarse gd                    |                      |        |           |                  |
|          |                 | MRC 369      | J                    | 2006    | 3395     |                               |               | MRC 369           |                              |                      |        |           |                  |
|          |                 | MRC 67       | J                    | 187     | 344      |                               |               | MRC 67            | Gd                           |                      |        |           |                  |
|          |                 | MRC 68       | J                    | 204     | 354      |                               |               | MRC 68            | Gd                           |                      |        |           |                  |
| 6        |                 |              | J                    | 07273   | 27746    | Newry Train Station           | N1A<br>N1B    |                   |                              |                      |        |           |                  |
|          |                 |              | J                    | 07193   | 27777    |                               |               |                   |                              |                      |        |           |                  |
| 7        |                 |              | J                    | 07860   | 22504    | Cloghoge Mountain Road Cutt   | C1            |                   |                              |                      |        |           |                  |
|          |                 | MRC 372      | J                    | 0786    | 2251     |                               |               | MRC 372           |                              |                      |        |           |                  |
| 8        |                 |              | J                    | 05557   | 22080    | Carn Hill                     | CTS1          |                   | Bt (felsic) gd               |                      |        |           |                  |
|          |                 |              | J                    | 05557   | 22080    |                               |               |                   | Enclave                      |                      |        |           |                  |
|          |                 |              | J                    | 05545   | 22111    |                               | C2B           |                   | Enclave                      |                      |        |           |                  |
|          |                 |              | J                    | 05545   | 22111    |                               | C2C           |                   | Enclave                      |                      |        |           |                  |
|          |                 |              | J                    | 05545   | 22111    |                               | C2D           |                   | Enclave                      |                      |        |           |                  |
| 10       |                 |              | J                    | 06517   | 32120    | Goragh Wood Quarry            | N2            |                   | Hb bt gd                     |                      |        |           |                  |
|          |                 |              | J                    | 06464   | 32083    |                               |               |                   |                              |                      |        |           |                  |
|          |                 |              | J                    | 06463   | 32019    |                               | N3            |                   |                              |                      |        |           |                  |
|          |                 | MRC 65       | J                    | 066     | 319      |                               |               | MRC 65            | Granitic pod                 |                      |        |           |                  |
|          |                 | MRC 66       | J                    | 066     | 319      |                               |               | MRC 66            | Hornfels & peg               |                      |        |           |                  |
| 11       |                 |              | J                    | 08014   | 23657    | Dublin Road Bridge            | C3A           |                   |                              |                      |        |           |                  |
|          |                 |              | J                    | 08009   | 23629    |                               | C3B           |                   |                              |                      |        |           |                  |
|          |                 |              | J                    | 08004   | 23587    |                               | C3C           |                   |                              |                      |        |           |                  |
|          |                 |              | J                    | 08077   | 23550    |                               | C3D           |                   |                              |                      |        |           |                  |
| 12       |                 |              | J                    | 21671   | 40681    | Shannaghan Hill               | R3A<br>R3B    |                   | Gd                           |                      |        |           |                  |
|          | 229             |              | J                    | 21671   | 40681    |                               |               |                   |                              |                      |        |           |                  |
|          |                 |              | J                    | 217     | 407      |                               |               |                   | Gd                           | Mineral foliation    | 56     | 75        | N                |
|          |                 |              | J                    | 218     | 407      |                               |               |                   | Gd                           | Mineral foliation    | 48     | 70        | N                |
|          |                 |              | J                    | 218     | 407      |                               |               |                   | H.rock                       | Xenolith cleavage    | 28     | 90        |                  |
|          |                 |              | J                    | 218     | 407      |                               |               |                   | Gd                           | Mineral foliation    | 60     | 90        |                  |
|          |                 |              | J                    | 218     | 407      |                               |               |                   | H.rock                       | Xenolith orientation | 55     | 75        | N                |
|          |                 |              | J                    | 218     | 408      |                               |               |                   | Gd dyke                      | Dyke Contact         | 120    | 90        |                  |
|          |                 |              | J                    | 218     | 408      |                               |               |                   | Gd dyke                      | Mineral foliation    | 58     | 75        | N                |
| 14       |                 |              | J                    | 27834   | 33094    | Kilcoo                        | R5A           |                   | Quartz di                    |                      |        |           |                  |
|          |                 |              | J                    | 27806   | 33134    |                               | R5B           |                   | Quartz di                    |                      |        |           |                  |
|          |                 | MRC 364      | J                    | 2782    | 3315     |                               |               | MRC 364           | Quartz di                    |                      |        |           |                  |
| 15       |                 |              | J                    | 24837   | 33582    | St Mary's Church              | R6            |                   |                              |                      |        |           |                  |
|          |                 | MRC 367      | J                    | 2483    | 3360     |                               |               | MRC 367           | Gd                           |                      |        |           |                  |
| 16       |                 |              | J                    | 16626   | 29174    | Ballydoo Road                 |               |                   |                              |                      |        |           |                  |
|          |                 |              | J                    | 16630   | 29171    |                               |               |                   | H.rock                       | Bedding              | 32     | 66        | E                |
|          |                 |              | J                    | 16630   | 29171    |                               |               |                   | H.rock                       | Cleavage             | 95     | 67        | S                |
|          |                 |              | J                    | 16630   | 29171    |                               |               |                   | H.rock                       | Bedding              | 50     | 44        | SE               |
|          |                 |              | J                    | 16630   | 29171    |                               |               |                   | H.rock                       | Bedding              | 53     | 58        | SE               |
|          |                 |              | J                    | 16630   | 29171    |                               |               |                   | H.rock                       | Bedding              | 55     | 63        | SE               |
| 17       |                 |              | J                    | 14423   | 25146    | Aughnagon Quarry              | N4A           |                   | Gd                           |                      |        |           |                  |
|          |                 |              | J                    | 14423   | 25146    |                               | N4B           |                   | Gd                           |                      |        |           |                  |
|          |                 |              | J                    | 14423   | 25146    |                               | N4C           |                   | Gd                           |                      |        |           |                  |
|          |                 | MRC 370      | J                    | 1439    | 2515     |                               |               | MRC 370           | Gd                           |                      |        |           |                  |
|          |                 | MRC 62       | J                    | 145     | 251      |                               |               | MRC 62            | Gd                           |                      |        |           |                  |
|          |                 | MRC 63       | J                    | 145     | 251      |                               |               | MRC 63            | Gd                           |                      |        |           |                  |
|          |                 | MRC 64       | J                    | 145     | 251      |                               |               | MRC 64            | Hornfels                     |                      |        |           |                  |
| 18       |                 |              | J                    | 12565   | 29160    | Benagh Road                   | N5A           |                   |                              |                      |        |           |                  |
|          |                 |              | J                    | 12584   | 29088    |                               | N5B           |                   |                              |                      |        |           |                  |
|          |                 |              | J                    | 12584   | 29088    |                               | N5C           |                   |                              |                      |        |           |                  |
|          |                 |              | J                    | 12960   | 28503    |                               | N5D           |                   |                              |                      |        |           |                  |
|          |                 | MRC 371      | J                    | 1242    | 2982     |                               |               | MRC 371           | Gd                           |                      |        |           |                  |
|          | 266             |              | J                    | 129     | 286      |                               |               |                   | Bt Gd                        | Mineral foliation    | 130    | Uncertain | NW?              |
| 19       |                 |              | J                    | 10126   | 24878    | Road Stud Installations       | N7            |                   |                              |                      |        |           |                  |
|          | 351             |              | J                    | 094     | 255      |                               |               |                   | Medium-Coarse Gd             | Mineral foliation    | 65     | 80        | N                |
| 20       |                 |              | J                    | 09229   | 26385    | Concrete Football Pitch       | N8            |                   |                              |                      |        |           |                  |
| 21       |                 |              | J                    | 09207   | 25930    | Newry Junction                | N9            |                   |                              |                      |        |           |                  |
| 22       |                 |              | J                    | 09023   | 26444    |                               | N10           |                   |                              |                      |        |           |                  |
| 23       |                 |              | J                    | 02755   | 26310    |                               | C5            |                   |                              |                      |        |           |                  |
| 24       |                 |              | J                    | 02908   | 25932    | Camlough Lake                 | C6            |                   |                              |                      |        |           |                  |
| 25       |                 |              | J                    | 02939   | 25811    |                               | C7            |                   |                              |                      |        |           |                  |
|          | 341             |              | J                    | 029     | 258      |                               |               |                   | Granite                      | Fabric               | 138    | 75        | W                |

| Locality |                 |           |                      |         |          | Sample                        |               |                 | Structural data        |                   |        |               |                  |
|----------|-----------------|-----------|----------------------|---------|----------|-------------------------------|---------------|-----------------|------------------------|-------------------|--------|---------------|------------------|
| Loc. No. | Hurley Loc. No. | GSNI site | Irish Grid reference |         |          | Locality Name (if applicable) | Sample number | GSNI sample no. | Lithology              | Measurement type  | Strike | Dip           | Direction of dip |
|          |                 |           | Grid                 | Easting | Northing |                               |               |                 |                        |                   |        |               |                  |
|          |                 |           | J                    | 029     | 258      |                               |               |                 | Granite                | Fabric            | 38     | 70            | N                |
|          | 337             |           | J                    | 0295    | 2600     |                               |               |                 | Medium granite         | Mineral foliation | 18     | 90            |                  |
|          |                 |           | J                    | 0295    | 2600     |                               |               |                 | Medium granite         | Mineral foliation | 15     | 90            |                  |
|          |                 |           | J                    | 0295    | 2600     |                               |               |                 | Medium granite         | Mineral foliation | 130    | 70            | NE               |
|          | 338             |           | J                    | 029     | 261      |                               |               |                 | Medium granite         | Mineral foliation | 150    | 90            |                  |
|          | 339             |           | J                    | 0285    | 2610     |                               |               |                 | Granite                | Mineral foliation | 135    | 80            | W                |
|          |                 |           | J                    | 0285    | 2610     |                               |               |                 | Granite                | Mineral foliation | 130    | 80            | W                |
|          | 340             |           | J                    | 0295    | 2590     |                               |               |                 | Granite                | Mineral foliation | 138    | 75            | W                |
| 26       |                 |           | J                    | 03568   | 24829    |                               | C8            |                 |                        |                   |        |               |                  |
|          |                 | MRC 61    | J                    | 037     | 246      |                               |               | MRC 61          | Mobil hornfels and gd  |                   |        |               |                  |
|          | 359             |           | J                    | 035     | 251      |                               |               |                 | Felsite-Gd             | Internal Contact  | 120    | Uncertain     |                  |
|          |                 |           | J                    | 035     | 251      |                               |               |                 | Medium-Coarse Gd       | Mineral foliation | 110    | 75            | N                |
|          |                 |           | J                    | 035     | 251      |                               |               |                 | Felsite-Gd             | Sheet Contact     | 80     | 80            | N                |
|          | 325             |           | J                    | 0410    | 2375     |                               |               |                 | Medium-fine Granite    | Mineral foliation | 60     | Not specified |                  |
|          | 326             |           | J                    | 034     | 247      |                               |               |                 | Granitic sheet         | Sheet Contact     | 75     | 75            | N                |
|          |                 |           | J                    | 034     | 247      |                               |               |                 | Granitic sheet-h. Rock | Sheet Contact     | 70     | 90            |                  |
|          |                 |           | J                    | 034     | 247      |                               |               |                 | Felsite intrusion      | Sheet Contact     | 115    | 50            | N                |
|          |                 |           | J                    | 034     | 247      |                               |               |                 | Granitic sheet-h. rock | Sheet Contact     | 60     | 65            | N                |
|          | 329             |           | J                    | 025     | 252      |                               |               |                 | Granite                | Mineral foliation | 40     | 50            | S                |
|          | 331             |           | J                    | 028     | 268      |                               |               |                 | Coarse Gd              | Mineral foliation | 180    | 65            | W                |
|          |                 |           | J                    | 028     | 268      |                               |               |                 | Coarse Gd              | Mineral foliation | 180    | 60            | W                |
| 27       |                 |           | J                    | 10126   | 32674    | Corcrechy Road                | N11A          |                 |                        |                   |        |               |                  |
|          |                 |           | J                    | 10103   | 32713    |                               | N11B          |                 |                        |                   |        |               |                  |
| 28       |                 |           | J                    | 09972   | 29393    |                               | N12           |                 |                        |                   |        |               |                  |
| 270      |                 |           | J                    | 101     | 293      |                               |               |                 | Bt gd                  | Mineral foliation | 40     | 60            | W                |
| 29       |                 |           | J                    | 10064   | 29275    |                               | N13           |                 |                        |                   |        |               |                  |
| 271      |                 |           | J                    | 100     | 295      |                               |               |                 | Bt gd                  | Mineral foliation | 62     | 60            | NW               |
| 30       |                 |           | J                    | 11623   | 28626    |                               | N14           |                 |                        |                   |        |               |                  |
| 268      |                 |           | J                    | 115     | 287      |                               |               |                 | Bt gd                  | Mineral foliation | 118    | 5             | S                |
| 31       |                 |           | J                    | 11666   | 28942    |                               | N15           |                 |                        |                   |        |               |                  |
| 32       |                 |           | J                    | 12208   | 29260    | Shanlieven Stone Quarry       | N16A          |                 |                        |                   |        |               |                  |
|          |                 |           | J                    | 12202   | 29204    |                               | N16B          |                 |                        |                   |        |               |                  |
|          |                 |           | J                    | 12172   | 29181    |                               | N16C          |                 |                        |                   |        |               |                  |
| 33       |                 |           | J                    | 11519   | 30136    |                               | N17           |                 |                        |                   |        |               |                  |
| 34       |                 |           | J                    | 18069   | 33162    |                               | R7A           |                 |                        |                   |        |               |                  |
|          |                 |           | J                    | 18128   | 33437    |                               | R7B           |                 |                        |                   |        |               |                  |
| 259      |                 |           | J                    | 179     | 333      |                               |               |                 | Bt gd                  | Mineral foliation | 150    | 60            | W                |
|          |                 |           | J                    | 179     | 333      |                               |               |                 | Bt gd                  | Mineral foliation | 142    | 70            | W                |
| 260      |                 |           | J                    | 179     | 331      |                               |               |                 | Gd                     | Mineral foliation | 119    | 80            | N                |
|          |                 |           | J                    | 179     | 331      |                               |               |                 | Gd                     | Mineral foliation | 130    | 70            | N                |
| 35       |                 |           | J                    | 15873   | 31380    |                               | N18           |                 |                        |                   |        |               |                  |
| 36       |                 |           | J                    | 17357   | 31656    |                               | N19           |                 |                        |                   |        |               |                  |
| 37       |                 |           | J                    | 16559   | 33427    |                               | R8            |                 |                        |                   |        |               |                  |
| 258      |                 |           | J                    | 166     | 331      |                               |               |                 | Bt gd                  | Mineral foliation | 160    | ?             | E                |
|          |                 |           | J                    | 166     | 331      |                               |               |                 | Lampro-gd              | Dyke contact      | 68     | 90            | N                |
| 38       |                 |           | J                    | 15097   | 34837    | Curley Lane                   | R9            |                 |                        |                   |        |               |                  |
| 39       |                 |           | J                    | 13693   | 31946    | A25 Farmland                  | N20A          |                 | Gd                     |                   |        |               |                  |
|          |                 |           | J                    | 13592   | 31955    |                               | N20C          |                 | Porphyry gd            |                   |        |               |                  |
| 40       |                 |           | J                    | 14774   | 31161    |                               | N21A          |                 | Fine gd                |                   |        |               |                  |
|          |                 |           | J                    | 14702   | 31325    |                               | N21B          |                 |                        |                   |        |               |                  |
| 41       |                 |           | J                    | 05178   | 16385    | Moore's Bridge                | C9            |                 |                        |                   |        |               |                  |
| 42       |                 |           | J                    | 05194   | 16288    |                               | C10           |                 |                        |                   |        |               |                  |
| 43       |                 |           | J                    | 07786   | 21341    | Cloghoge Railway Track        | C11(A)        |                 |                        |                   |        |               |                  |
|          |                 |           | J                    | 07871   | 21379    |                               | C11B          |                 |                        |                   |        |               |                  |
|          |                 |           | J                    | 08055   | 21477    |                               | C11C          |                 |                        |                   |        |               |                  |
|          |                 |           | J                    | 08197   | 21534    |                               | C11D          |                 |                        |                   |        |               |                  |
|          |                 |           | J                    | 08492   | 21812    |                               | C11E          |                 |                        |                   |        |               |                  |
|          |                 |           | J                    | 08610   | 22299    |                               | C11F          |                 |                        |                   |        |               |                  |
| 44       |                 |           | J                    | 32567   | 40175    |                               | R10           |                 | Coarse bt gd           |                   |        |               |                  |
| 435      |                 |           | J                    | 326     | 399      |                               |               |                 | Gd                     | Mineral foliation | 5      | 75            | E                |
| 436      |                 |           | J                    | 326     | 398      |                               |               |                 | Gd                     | Mineral foliation | 6      | 65            | E                |
| 45       |                 |           | J                    | 32407   | 40199    |                               | R11           |                 | Bt gd                  |                   |        |               |                  |
|          |                 |           | J                    | 32404   | 40149    |                               | R11B          |                 | Bt gd                  | Mineral foliation | 8      | 55            | E                |
| 437      |                 |           | J                    | 325     | 405      |                               |               |                 | Gd                     | Mineral foliation | 150    | 65            | E                |
| 46       |                 |           | J                    | 31820   | 40634    |                               | R12           |                 |                        | Mineral foliation | 330    | 85            | NE               |
| 47       |                 |           | J                    | 31667   | 40641    |                               | R13           |                 | Fine hb bt gd          | Mineral foliation | 335    | 80            | NE               |
| 48       |                 |           | J                    | 31511   | 40671    | Leitrim Hilltop               | R14           |                 | Fine hb bt gd          |                   |        |               |                  |
| 438      |                 |           | J                    | 312     | 412      |                               |               |                 | Fine Gd                | Mineral foliation | 158    | 70            | E                |
|          |                 |           | J                    | 312     | 412      |                               |               |                 | Fine Gd                | Mineral foliation | 140    | 70            | E                |
|          |                 |           | J                    | 312     | 412      |                               |               |                 | Aplite vein            | Vein Orientation  | 80     | 50            | S                |
|          |                 |           | J                    | 312     | 412      |                               |               |                 | Aplite vein            | Vein Orientation  | 70     | 65            | S                |
| 439      |                 |           | J                    | 312     | 411      |                               |               |                 | Fine Gd                | Mineral foliation | 150    | 75            | E                |
| 440      |                 |           | J                    | 313     | 410      |                               |               |                 | Fine Gd                | Mineral foliation | 155    | 80            | E                |
|          |                 |           | J                    | 313     | 410      |                               |               |                 | Aplite vein            | Vein Orientation  | 120    | 90            |                  |
|          |                 |           | J                    | 313     | 410      |                               |               |                 | Aplite vein            | Vein Orientation  | 95     | 90            |                  |
| 441      |                 |           | J                    | 314     | 410      |                               |               |                 | Lampro dyke            | Dyke Contact      | 85     | 90            |                  |
|          |                 |           | J                    | 314     | 410      |                               |               |                 | Fine Gd                | Mineral foliation | 160    | 75            | E                |
| 49       |                 |           | J                    | 31672   | 40808    |                               | R15           |                 |                        |                   |        |               |                  |
| 50       |                 |           | J                    | 28375   | 39567    |                               | R16           |                 |                        | Mineral foliation | 142    | 90            |                  |
| 187      |                 |           | J                    | 313     | 400      |                               |               |                 | Gd                     | Mineral foliation | 140    | 70            | E                |
|          |                 |           | J                    | 314     | 399      |                               |               |                 | Gd                     | Mineral foliation | 160    | 50            | E                |
|          |                 |           | J                    | 314     | 399      |                               |               |                 | Gd                     | Mineral foliation | 160    | 30            | E                |
|          |                 |           | J                    | 314     | 399      |                               |               |                 | Aplite vein            | Vein orientation  | 91     | 75            | N                |
|          |                 |           | J                    | 314     | 400      |                               |               |                 | Gd                     | Mineral foliation | 175    | 60            | E                |
|          |                 |           | J                    | 314     | 400      |                               |               |                 | Gd                     | Mineral foliation | 8      | 70            | S                |

| Locality |                 |           |                      |         |          | Sample                        |               |                 | Structural data        |                      |        |           |                  |
|----------|-----------------|-----------|----------------------|---------|----------|-------------------------------|---------------|-----------------|------------------------|----------------------|--------|-----------|------------------|
| Loc. No. | Hurley Loc. No. | GSNI site | Irish Grid reference |         |          | Locality Name (if applicable) | Sample number | GSNI sample no. | Lithology              | Measurement type     | Strike | Dip       | Direction of dip |
|          |                 |           | Grid                 | Easting | Northing |                               |               |                 |                        |                      |        |           |                  |
|          |                 |           | J                    | 314     | 398      |                               |               |                 | Fine Gd                | Mineral foliation    | 9      | 65        | E                |
|          |                 |           | J                    | 314     | 398      |                               |               |                 | Coarse Gd              | Vein orientation     | 100    | 55        | E                |
|          |                 |           | J                    | 314     | 398      |                               |               |                 | Vein of Coarse Gd      | Mineral foliation    | 150    | 40        | E                |
|          |                 |           | J                    | 314     | 398      |                               |               |                 | Gd                     | Mineral foliation    | 180    | 70        | E                |
|          |                 |           | J                    | 314     | 398      |                               |               |                 | Gd                     | Mineral foliation    | 9      | 50        | E                |
|          |                 |           | J                    | 314     | 399      |                               |               |                 | Lampro Dyke            | Dyke Contact         | 49     | 85        | S                |
|          |                 |           | J                    | 314     | 399      |                               |               |                 | Gd                     | Mineral foliation    | 160    | 70        | E                |
|          | 188             |           | J                    | 308     | 391      |                               |               |                 | Bt Gd                  | Mineral foliation    | 4      | 75        | E                |
|          |                 |           | J                    | 308     | 391      |                               |               |                 | Bt Gd                  | Mineral foliation    | 173    | 70        | E                |
| 51       |                 |           | J                    | 27888   | 40407    |                               | R17           |                 |                        |                      |        |           |                  |
| 52       | 277             |           | J                    | 26797   | 35287    |                               | R18           |                 |                        | Mineral foliation    | 35     | 85        | SE               |
|          |                 |           | J                    | 267     | 352      |                               |               |                 | Coarse Gd              | Mineral foliation    | 20     | 90        |                  |
|          |                 |           | J                    | 267     | 352      |                               |               |                 | Fine Gd                | Mineral foliation    | 24     | 70        | SE               |
|          |                 |           | J                    | 267     | 352      |                               |               |                 | Fine Gd                | Mineral foliation    | 20     | 60        | S                |
|          |                 |           | J                    | 267     | 352      |                               |               |                 | Diorite                | Mineral foliation    | 20     | 60        | S                |
|          |                 |           | J                    | 267     | 352      |                               |               |                 | Fine Gd vein           | Mineral foliation    | 20     | 60        | S                |
|          |                 |           | J                    | 267     | 352      |                               |               |                 | Fine Gd vein-diorite   | Vein orientation     | 13     | 63        | S                |
|          | 276             |           | J                    | 269     | 355      | Poags Bridge                  |               |                 | Aplite vein            | Mineral foliation    | 40     | 90        |                  |
|          |                 |           | J                    | 269     | 355      |                               |               |                 | Aplite vein            | Mineral foliation    | 42     | 79        | S                |
|          |                 |           | J                    | 269     | 355      |                               |               |                 | Lampro dyke-Gd         | Dyke contact         | 98     | 79        | S                |
|          |                 |           | J                    | 269     | 355      |                               |               |                 | Coarse Gd              | Mineral foliation    | 32     | 65        | S                |
|          |                 |           | J                    | 269     | 355      |                               |               |                 | Coarse Gd              | Mineral foliation    | 35     | 70        | S                |
|          |                 |           | J                    | 269     | 355      |                               |               |                 | Coarse Gd              | Mineral foliation    | 34     | 70        | S                |
|          |                 |           | J                    | 269     | 355      |                               |               |                 | Aplite dyke            | Dyke contact         | 170    | 70        | E                |
| 53       |                 |           | J                    | 30446   | 35749    |                               | R19           |                 |                        |                      |        |           |                  |
| 54       |                 |           | J                    | 30344   | 34490    |                               | R20           |                 | Hb bt gd               |                      |        |           |                  |
| 55       |                 |           | J                    | 30251   | 34416    |                               | R21           |                 | Hb bt gd               |                      |        |           |                  |
|          |                 |           | J                    | 302     | 344      |                               |               |                 | Stringers (mainly qtz) | Vein Orientation     | 25     | 60        | S                |
|          |                 |           | J                    | 302     | 344      |                               |               |                 | Gd                     | Mineral foliation    | 60     | 65        | S                |
|          |                 |           | J                    | 302     | 344      |                               |               |                 | Gd                     | Shear zone           | 120    | Uncertain |                  |
|          | 210             |           | J                    | 301     | 346      |                               |               |                 | Gd                     | Shear zone           | 170    | Uncertain |                  |
|          | 211             |           | J                    | 302     | 347      |                               |               |                 | Lampro Dyke            | Dyke Contact         | 148    | 80        | NE               |
|          |                 |           | J                    | 302     | 347      |                               |               |                 | Lampro Dyke            | (Dyke) cleavage      | 175    | 85        | E                |
|          |                 |           | J                    | 302     | 347      |                               |               |                 | Qtz vein               | Vein Orientation     | 88     | 50        | S                |
|          |                 |           | J                    | 302     | 347      |                               |               |                 | Gd                     | Deformation zone     | 150    | Uncertain |                  |
|          |                 |           | J                    | 302     | 347      |                               |               |                 | Lampro Dyke            | (Dyke) cleavage      | 124    | 54        | NE               |
|          |                 |           | J                    | 302     | 347      |                               |               |                 | Lampro Dyke            | (Dyke) cleavage      | 180    | 62        | E                |
|          |                 |           | J                    | 302     | 347      |                               |               |                 | Sedimentary xenolith   | Xenolith orientation | 24     | 70        | E                |
|          |                 |           | J                    | 302     | 348      |                               |               |                 | Lampro Dyke            | ?Dyke Contact        | 150    | 70        | E                |
|          |                 |           | J                    | 302     | 348      |                               |               |                 | Lampro Dyke            | (Dyke) cleavage      | 15     | 65        | E                |
|          |                 |           | J                    | 302     | 348      |                               |               |                 | Gd                     | Mineral foliation    | 180    | 60        | E                |
|          |                 |           | J                    | 302     | 348      |                               |               |                 | Gd                     | Mineral foliation    | 90     | 65        | S                |
|          | 212             |           | J                    | 301     | 348      |                               |               |                 | Gd                     | Mineral foliation    | 95     | 65        | E                |
|          |                 |           | J                    | 301     | 348      |                               |               |                 | Gd                     | Mineral foliation    | 55     | 60        | S                |
|          |                 |           | J                    | 301     | 348      |                               |               |                 | Lampro Dyke            | Dyke Contact         | 145    | Uncertain |                  |
|          |                 |           | J                    | 301     | 348      |                               |               |                 | Lampro Dyke            | Dyke Contact         | 120    | 90        |                  |
|          |                 |           | J                    | 301     | 348      |                               |               |                 | Lampro Dyke            | (Dyke) cleavage      | 150    | 65        | NE               |
| 56       |                 |           | J                    | 31548   | 38363    | Castlewellan Forest Park      | R22           |                 | Bt Gd                  |                      |        |           |                  |
| 57       |                 |           | J                    | 33156   | 44833    |                               | R23(A)        |                 | Mafic gd               |                      |        |           |                  |
|          |                 |           | J                    | 33140   | 44836    |                               | R23B          |                 |                        |                      |        |           |                  |
| 58       |                 |           | J                    | 32812   | 44579    |                               | R24           |                 | Fine hb gd             |                      |        |           |                  |
|          | 217             |           | J                    | 326     | 448      |                               |               |                 | Gd                     | Mineral foliation    | 126    | 70        | E                |
|          |                 |           | J                    | 326     | 448      |                               |               |                 | Xenolith               | Xenolith orientation | 18     | Uncertain |                  |
|          | 218             |           | J                    | 324     | 449      |                               |               |                 | Gd                     | Mineral foliation    | 115    | 90        |                  |
|          |                 |           | J                    | 324     | 449      |                               |               |                 | Hornfels               | Xenolith orientation | 115    | 90        |                  |
|          | 219             |           | J                    | 323     | 450      |                               |               |                 | Lampro Dyke            | Dyke Contact         | 5      | 80        | E                |
|          |                 |           | J                    | 323     | 450      |                               |               |                 | Gd                     | Mineral foliation    | 110    | 80        | SW               |
|          |                 |           | J                    | 323     | 450      |                               |               |                 | Lampro Dyke            | Mineral foliation    | 78     | 90        |                  |
| 59       |                 |           | J                    | 27402   | 43019    | Windy Gap                     | R25           |                 |                        |                      |        |           |                  |
| 60       |                 |           | J                    | 27372   | 43049    |                               | R26           |                 | Bt gd                  |                      |        |           |                  |
|          | 221             |           | J                    | 272     | 444      |                               |               |                 | Qtz vein               | Vein Orientation     | 60     | 80        | N                |
|          |                 |           | J                    | 272     | 444      |                               |               |                 | Qtz vein               | Vein Orientation     | 80     | 78        | N                |
|          | 222             |           | J                    | 273     | 439      |                               |               |                 | Coarse Gd              | Mineral foliation    | 65     | 68        | N                |
|          |                 |           | J                    | 273     | 439      |                               |               |                 | Coarse Gd              | Mineral foliation    | 68     | 35        | N                |
|          | 243             |           | J                    | 281     | 438      |                               |               |                 | Gd                     | Mineral foliation    | 85     | 65        | N                |
|          |                 |           | J                    | 281     | 438      |                               |               |                 | Qtz diorite?           | Mineral foliation    | 60     | 70        | N                |
|          |                 |           | J                    | 281     | 438      |                               |               |                 |                        | Internal contact     | 60     | Uncertain | NW-SE            |
|          |                 |           | J                    | 281     | 4348     |                               |               |                 | Gd                     | Mineral foliation    | 80     | 70        | N                |
|          | 245             |           | J                    | 278     | 444      | Rough Hill                    |               |                 | ?H. rock-Qtz diorite   | Contact              | 50     | 90        | N                |
|          |                 |           | J                    | 278     | 444      |                               |               |                 | ?Qtz diorite           | Mineral foliation    | 85     | 65        | S                |
|          |                 |           | J                    | 278     | 444      |                               |               |                 | ?Qtz diorite           | Mineral foliation    | 110    | 70        | N                |
| 61       |                 |           | J                    | 25804   | 42543    | Dehomed Mountain              | R27           |                 | Mafic granodiorite     |                      |        |           |                  |
|          | 223             |           | J                    | 256     | 428      |                               |               |                 | Aplite vein            | Vein Orientation     | 156    | 20        | E                |
|          |                 |           | J                    | 256     | 428      |                               |               |                 | Aplite vein            | Vein Orientation     | 136    | 15        | W                |
|          |                 |           | J                    | 256     | 428      |                               |               |                 | Aplite vein            | Mineral foliation    | 75     | 72        | N                |
|          |                 |           | J                    | 256     | 428      |                               |               |                 | Fold in aplite vein    | Fold axial plane     | 79     | 72        | N                |
|          |                 |           | J                    | 255     | 426      |                               |               |                 | Host rock-Gd           | Contact              | 100    | Uncertain |                  |
|          |                 |           | J                    | 255     | 426      |                               |               |                 | Gd                     | Dyke Contact         | 18     | 38        | E                |
|          |                 |           | J                    | 255     | 426      |                               |               |                 | (Dyke) Gd              | Mineral foliation    | 82     | 80        | N                |
|          |                 |           | J                    | 255     | 426      |                               |               |                 | (Dyke) Gd              | Mineral foliation    | 100    | 45        |                  |
|          |                 |           | J                    | 255     | 426      |                               |               |                 | Country rock-Gd        | Contact              | 90     | Uncertain |                  |
|          | 224             |           | J                    | 253     | 424      |                               |               |                 | Gd                     | Mineral foliation    | 88     | 90        |                  |
|          |                 |           | J                    | 253     | 424      |                               |               |                 | Coarse Gd              | Mineral foliation    | 80     | 78        | N                |
|          |                 |           | J                    | 253     | 424      |                               |               |                 | Lampro Dyke            | Dyke Contact         | 175    | 90        |                  |
|          | 225             |           | J                    | 262     | 432      |                               |               |                 | Gd                     | Mineral foliation    | 85     | 59        | N                |
|          |                 |           | J                    | 262     | 432      |                               |               |                 | Gd                     | Mineral foliation    | 86     | 90        |                  |
|          |                 |           | J                    | 262     | 432      |                               |               |                 | Lampro Dyke            | Dyke Contact         | 162    | 90        |                  |
| 62       |                 |           | J                    | 17804   | 37634    | Knockiveagh Hill              | R28           |                 | Hb gd                  |                      |        |           |                  |

| Locality |                 |           |                      |         |          | Sample                        |               |                 | Structural data                 |                      |                   |     |                  |    |
|----------|-----------------|-----------|----------------------|---------|----------|-------------------------------|---------------|-----------------|---------------------------------|----------------------|-------------------|-----|------------------|----|
| Loc. No. | Hurley Loc. No. | GSNI site | Irish Grid reference |         |          | Locality Name (if applicable) | Sample number | GSNI sample no. | Lithology                       | Measurement type     | Strike            | Dip | Direction of dip |    |
|          |                 |           | Grid                 | Easting | Northing |                               |               |                 |                                 |                      |                   |     |                  |    |
| 63       |                 |           | J                    | 17759   | 37687    |                               | R29           |                 | ?Qtz diorite                    |                      |                   |     |                  |    |
|          | 233             |           | J                    | 178     | 377      |                               |               |                 | Gd                              | Mineral foliation    | 180               | 75  | W                |    |
|          |                 |           |                      |         |          |                               |               |                 | Gd                              | Mineral foliation    | 15                | 80  | W                |    |
|          | 234             |           | J                    | 182     | 378      |                               |               |                 |                                 | Mineral foliation    | 48                | 75  | S                |    |
|          |                 |           |                      |         |          |                               |               |                 |                                 | Mineral foliation    | 30                | 90  | W                |    |
|          | 235             |           | J                    | 183     | 377      |                               |               |                 | Lampro dyke                     | Dyke contact         | 60                | 70  | S                |    |
|          |                 |           |                      |         |          |                               |               |                 | Gd                              | Mineral foliation    | 60                | 70  | S                |    |
|          | 236             |           | J                    | 181     | 378      |                               |               |                 | Lampro dyke                     | Mineral foliation    | 46                | 70  | N                |    |
|          | 238             |           | J                    | 180     | 378      |                               |               | Gd              | Mineral foliation               | 70                   | 70                | S   |                  |    |
|          |                 |           | J                    | 180     | 378      |                               |               | Gd              | Mineral foliation               | 48                   | 60                | S   |                  |    |
|          |                 |           | J                    | 180     | 378      |                               |               | Gd              | Mineral foliation               | 55                   | 75                | N   |                  |    |
|          | 240             |           | J                    | 181     | 379      |                               |               | Gd              | Mineral foliation               | 180                  | 90                | W   |                  |    |
|          | 241             |           | J                    | 178     | 378      |                               |               | Gd              | Mineral foliation               | 178                  | 75                | W   |                  |    |
| 64       |                 |           | J                    | 07170   | 26306    | Newry Railway Tunnel          | N22A          |                 | Gd                              |                      |                   |     |                  |    |
|          |                 |           | J                    | 07170   | 26306    |                               | N22B          |                 | Coarse Gd                       |                      |                   |     |                  |    |
|          |                 |           | J                    | 07170   | 26306    |                               | N22C          |                 | Porphy Gd                       |                      |                   |     |                  |    |
| 65       |                 |           | J                    | 07112   | 26595    |                               | N23           |                 | Medium-coarse gd                |                      |                   |     |                  |    |
| 67       |                 |           | J                    | 07096   | 26817    |                               | N24           |                 |                                 |                      |                   |     |                  |    |
| 68       |                 |           | J                    | 08001   | 23831    | Cloghoge Roundabout North     | (N)C12(A)     |                 | Coarse mafic gd                 | Mineral foliation    | 150               | 60  | SW               |    |
|          |                 |           | J                    | 08001   | 23831    |                               |               |                 |                                 | Coarse mafic gd      | Mineral foliation | 149 | 85               | SW |
|          |                 |           | J                    | 08001   | 23831    |                               |               |                 |                                 | Gd vein              | Vein orientation  | 145 | 80               | SW |
|          |                 |           | J                    | 08001   | 23831    | 315                           | (N)C12B       |                 |                                 |                      |                   |     |                  |    |
|          |                 |           | J                    | 0795    | 2395     |                               |               |                 |                                 | Coarse Gd            | Mineral foliation | 160 | 90               |    |
|          |                 |           | J                    | 0795    | 2395     |                               |               |                 |                                 | Coarse Gd            | Shear Zone        | 162 | 75               | W  |
| 69       |                 |           | J                    | 07975   | 23869    |                               | (N)C13        |                 | Coarse mafic gd                 |                      |                   |     |                  |    |
| 70       |                 |           | J                    | 07964   | 23887    |                               | NC14          |                 | Felsic gd                       |                      |                   |     |                  |    |
|          |                 |           | J                    | 07964   | 23887    |                               | NC15          |                 | Porphyritic diorite             |                      |                   |     |                  |    |
|          |                 |           | J                    | 07964   | 23887    |                               | NC16          |                 | Felsic gd/porph diorite contact |                      |                   |     |                  |    |
|          |                 |           | J                    | 07954   | 23890    |                               | NC17          |                 | Porphyritic diorite             |                      |                   |     |                  |    |
| 71       |                 |           | J                    | 07921   | 23973    |                               | NC18          |                 | Host rock screen                | Xenolith orientation | 47                | 85  | NW               |    |
|          | 317             |           | J                    | 0790    | 2405     |                               |               |                 | Gd                              | Shear Zone           | 180               | 40  | W                |    |
|          |                 |           | J                    | 0790    | 2405     |                               |               |                 | Gd                              | Mineral foliation    | 30                | 90  |                  |    |
|          |                 | MRC 58    | J                    | 0707    | 240      |                               |               | MRC 58          | Gd                              |                      |                   |     |                  |    |
| 72       |                 |           | J                    | 04180   | 29061    |                               | N25(A)        |                 | Coarse gd                       |                      |                   |     |                  |    |
|          | 373             |           | J                    | 04129   | 29099    |                               | N25B          |                 | Coarse gd                       |                      |                   |     |                  |    |
|          |                 |           | J                    | 041     | 291      |                               |               |                 | Granite                         | Mineral foliation    | 50                | 75  | S                |    |
|          |                 |           | J                    | 041     | 291      |                               |               |                 | Granite                         | Mineral foliation    | 30                | 75  | S                |    |
|          |                 |           | J                    | 041     | 291      |                               |               |                 | Aplite vein                     | Vein Orientation     | 5                 | 65  | E                |    |
|          |                 |           | J                    | 041     | 291      |                               |               |                 | Coarse Granite                  | Mineral foliation    | 50                | 90  |                  |    |
|          |                 |           | J                    | 041     | 291      |                               |               |                 | Coarse Granite                  | Mineral foliation    | 50                | 75  | E                |    |
|          | 374             |           | J                    | 043     | 290      |                               |               |                 | Coarse Granite                  | Mineral foliation    | 45                | 90  |                  |    |
|          |                 |           | J                    | 043     | 290      |                               |               |                 | Coarse Granite                  | Mineral foliation    | 25                | 75  | S                |    |
|          |                 |           | J                    | 043     | 290      |                               |               |                 | Microgranite                    | Mineral foliation    | 180               | 70  | W                |    |
|          |                 |           | J                    | 043     | 290      |                               |               |                 | Microgranite                    | Mineral lineation    | 270               | 70  |                  |    |
|          |                 |           | J                    | 043     | 290      |                               |               |                 | Granite                         | Mineral foliation    | 30                | 75  | NW               |    |
|          | 375             |           | J                    | 046     | 290      |                               |               |                 | Granite                         | Mineral foliation    | 29                | 45  | NW               |    |
|          |                 |           | J                    | 046     | 290      |                               |               |                 | Pegmatite                       | Vein Orientation     | 89                | 90  |                  |    |
|          | 376             |           | J                    | 046     | 289      |                               |               |                 | Fine Granite                    | Mineral foliation    | 9                 | 75  | N                |    |
|          |                 |           | J                    | 046     | 289      |                               |               |                 | Fine Granite                    | Mineral lineation    | 9                 | 15  |                  |    |
|          |                 |           | J                    | 046     | 289      |                               |               |                 | Fine Granite                    | Mineral foliation    | 30                | 75  | N                |    |
|          | 377             |           | J                    | 047     | 289      |                               |               |                 | Granite                         | Mineral foliation    | 3                 | 75  | W                |    |
| 73       |                 |           | J                    | 08149   | 24615    |                               | N26           |                 |                                 |                      |                   |     |                  |    |
|          | 309             |           | J                    | 081     | 247      |                               |               |                 | Coarse bt gd                    |                      |                   |     |                  |    |
|          |                 |           |                      |         |          |                               |               |                 | Gd                              | Mineral foliation    | 100               | 75  | S                |    |
| 74       |                 |           | J                    | 08960   | 24250    |                               | N27(A)        |                 |                                 |                      |                   |     |                  |    |
|          |                 |           | J                    | 08971   | 24205    |                               | N27B          |                 | Granite                         |                      |                   |     |                  |    |
| 75       |                 |           | J                    | 12039   | 26799    |                               | N28           |                 | Coarse hb bt gd                 |                      |                   |     |                  |    |
| 76       |                 |           | J                    | 10517   | 25924    |                               | N29           |                 | Hb bt gd                        |                      |                   |     |                  |    |
| 77       |                 |           | J                    | 11085   | 24743    | Billys Road                   | N30(A)        |                 | hb gd                           | Mineral foliation    | 260               | 20  | N                |    |
|          |                 |           | J                    | 11085   | 24743    |                               |               |                 | hb gd                           | Mineral foliation    | 290               | 18  | N                |    |
|          |                 |           | J                    | 11108   | 24736    |                               | N30B          |                 | hb gd                           | Mineral foliation    | 255               | 60  | N                |    |
| 78       |                 |           | J                    | 11141   | 23536    | Greenan Lough                 | N31           |                 | Coarse bt gd                    |                      |                   |     |                  |    |
|          | 356             |           | J                    | 113     | 234      |                               |               |                 | Gd                              | Mineral foliation    | 60                | 55  | S                |    |
|          |                 |           | J                    | 113     | 234      |                               |               |                 | Gd                              | Mineral foliation    | 65                | 60  | S                |    |
|          |                 |           | J                    | 113     | 234      |                               |               |                 | Aplite sheet-Gd                 | Sheet Contact        | 25                | 25  | NW               |    |
|          | 358             |           | J                    | 1145    | 2335     |                               |               |                 | Fine granite                    | Mineral foliation    | 50                | 80  | S                |    |
|          |                 |           | J                    | 1145    | 2335     |                               |               |                 | Fine granite                    | Mineral foliation    | 50                | 80  | S                |    |
| 79       |                 |           | J                    | 04826   | 25619    | Camlough Mountain             | C19           |                 |                                 |                      |                   |     |                  |    |
| 80       |                 |           | J                    | 04862   | 25425    |                               | C20           |                 | Fine gd                         |                      |                   |     |                  |    |
|          | 372             |           | J                    | 051     | 255      |                               |               |                 | ?Fine Gd                        | Mineral foliation    | 60                | 65  | N                |    |
|          |                 |           | J                    | 051     | 255      |                               |               |                 | Gd                              | Mineral foliation    | 60                | 65  | N                |    |
| 81       |                 |           | J                    | 06910   | 24274    | Bernish Viewpoint             | C21           |                 | Granitic pegmatite              |                      |                   |     |                  |    |
| 82       |                 |           | J                    | 06928   | 24247    |                               | C22           |                 | Granitic pegmatite              |                      |                   |     |                  |    |
|          | 320             |           | J                    | 071     | 240      |                               |               |                 | Fine Granite-Coarse Gra         | Internal Contact     | 80                | 90  |                  |    |
|          |                 |           | J                    | 071     | 240      |                               |               |                 | Coarse Granite                  | Mineral foliation    | 100               | 90  |                  |    |
|          | 321             |           | J                    | 0705    | 2407     |                               |               |                 | Coarse Granite                  | Mineral foliation    | 120               | 70  | N                |    |
|          |                 |           | J                    | 0705    | 2407     |                               |               |                 | Coarse Granite                  | Mineral foliation    | 100               | 90  |                  |    |
|          |                 |           | J                    | 0697    | 2400     |                               |               |                 | Fine Granite-Fine Gran          | Internal Contact     | 120               | 80  | NE               |    |
|          |                 |           | J                    | 0697    | 2400     |                               |               |                 | Fine Granite                    | Mineral foliation    | 100               | 90  |                  |    |
| 86       |                 |           | J                    | 00640   | 25223    | Courtney Mountain             | C26           |                 | Granite (+ mafic patches)       |                      |                   |     |                  |    |
|          | 333             |           | J                    | 009     | 255      |                               |               |                 | Granite                         | Mineral foliation    | 20                | 80  | E                |    |
|          |                 |           | J                    | 009     | 255      |                               |               |                 | Granite                         | Mineral foliation    | 20                | 80  | E                |    |
|          |                 |           | J                    | 009     | 255      |                               |               |                 | Granite                         | Mineral foliation    | 20                | 90  |                  |    |
|          | 334             |           | J                    | 007     | 254      |                               |               |                 | Granite-felsic material         | Internal Contact     | 150               | 80  | E                |    |
|          |                 |           | J                    | 007     | 254      |                               |               |                 | Granite                         | Mineral foliation    | 40                | 80  | N                |    |
|          |                 |           | J                    | 007     | 254      |                               |               |                 | Granite                         | Mineral foliation    | 30                | 80  | E                |    |
|          | 335             |           | J                    | 004     | 255      |                               |               |                 | Felsic sheet-h.rock             | Sheet Contact        | 70                | 90  |                  |    |

| Locality |                 |           |                      |          |          | Sample                        |               |                 | Structural data          |                   |        |           |                  |
|----------|-----------------|-----------|----------------------|----------|----------|-------------------------------|---------------|-----------------|--------------------------|-------------------|--------|-----------|------------------|
| Loc. No. | Hurley Loc. No. | GSNI site | Irish Grid reference |          |          | Locality Name (if applicable) | Sample number | GSNI sample no. | Lithology                | Measurement type  | Strike | Dip       | Direction of dip |
|          |                 |           | Grid                 | Easting  | Northing |                               |               |                 |                          |                   |        |           |                  |
|          | 336             |           | J                    | 004      | 253      |                               |               |                 | Granite                  | Mineral foliation | 10     | 80        | NW               |
|          |                 |           | J                    | 004      | 253      |                               |               |                 | Granite-felsic body      | Internal Contact  | 15     | ? (steep) | NW               |
| 87       |                 |           | J                    | 22741    | 41884    | Doyles Road                   | T1            |                 | Fine gd                  |                   |        |           |                  |
|          |                 |           | J                    | 22741    | 41884    |                               |               |                 | Satellite gd-h.rock      | Satellite Contact | 157    | Uncertain | ?                |
|          |                 |           | J                    | 22741    | 41884    |                               |               |                 | C.rock                   | Bedding           | 72     | 72        | N                |
|          |                 |           | J                    | 22741    | 41884    |                               |               |                 | Satellite gd-h.rock      | Satellite Contact | 163    | 36        | E                |
|          |                 |           | J                    | 22741    | 41884    |                               |               |                 | Satellite gd-h.rock      | Satellite Contact | 178    | 80        | E                |
|          |                 |           | J                    | 22741    | 41884    |                               |               |                 | Satellite gd-h.rock      | Satellite Contact | 22     | 70        | W                |
| 88       |                 |           | J                    | 15390    | 38754    | Kilty Hill                    | T2(A)         |                 | Fine gd                  |                   |        |           |                  |
|          |                 |           | J                    | ? ~30m W | of above |                               | T2B           |                 | Porphyritic hb gd        | Mineral foliation | 46     | 73        | NW               |
| 89       |                 |           | J                    | 17320    | 27534    | Ballululany                   | T3            |                 | Gd                       |                   |        |           |                  |
|          |                 |           | J                    | 17325    | 27556    |                               |               |                 | H.rock                   | Bedding           | 74     | 25        | SE               |
|          |                 |           | J                    | 17325    | 27556    |                               |               |                 | Satellite gd-h.rock      | Satellite contact | 168    | 67        | E                |
| 90       |                 |           | J                    | 17503    | 28367    | Ballydoo Farm                 | T4(A)         |                 | Hb bt gd                 |                   |        |           |                  |
|          |                 |           | J                    | 17468    | 28321    |                               |               |                 | Satellite gd-h.rock      | Satellite contact | 38     | Uncertain | ?                |
|          |                 |           | J                    | 17423    | 28359    |                               | T4B           |                 | Bt gd                    |                   |        |           |                  |
|          |                 |           |                      |          |          |                               |               |                 | H.rock                   | Bedding           | 33     | 60        | SE               |
| 91       |                 |           | J                    | 17723    | 28066    | Leode Road Quarry             | T5            |                 | Fine hb gd               | Fabric            | 38     | 30        | E                |
|          |                 |           | J                    | 17723    | 28066    |                               |               |                 | C.rock                   | Bedding           | 25     | 48        | E                |
|          |                 |           | J                    | 17723    | 28066    |                               |               |                 | Satellite gd-h.rock      | Satellite Contact | 178    | 36        | E                |
|          |                 |           | J                    | 17642    | 28119    |                               | T5B           |                 | Fine hb gd               | Mineral foliation |        |           |                  |
|          |                 |           | J                    | 17642    | 28119    |                               |               |                 | Satellite gd-h.rock      | Satellite Contact | 26     | 45        | SE               |
|          |                 | MRC 59    | J                    | 184      | 288      |                               |               | MRC 59          | Hornfels and veinlet     |                   |        |           |                  |
|          |                 | MRC 368   | J                    | 2392     | 3892     |                               |               | MRC 368         | m-co Fol gd (titanites?) |                   |        |           |                  |
| 242      |                 |           | J                    | 247      | 395      |                               |               |                 | Gd                       | Mineral foliation | 100    | 90        | N                |
| 226      |                 |           | J                    | 292      | 415      |                               |               |                 | Gd                       | Mineral foliation | 62     | 78        | S                |
| 232      |                 |           | J                    | 181      | 362      |                               |               |                 | Gd                       | Mineral foliation | 45     | 80        | S                |
| 244      |                 |           | J                    | 317      | 437      |                               |               |                 | Gd                       | Mineral foliation | 85     | 75        | N                |
| 254      |                 |           | J                    | 159      | 355      |                               |               |                 | Gd                       | Mineral foliation | 30     | 70        | N                |
|          |                 |           | J                    | 159      | 355      |                               |               |                 | Gd                       | Mineral foliation | 22     | 72        | N                |
| 255      |                 |           | J                    | 161      | 355      |                               |               |                 | Gd                       | Mineral foliation | 30     | 70        | N                |
| 257      |                 |           | J                    | 111      | 318      |                               |               |                 | Bt Gd                    | Mineral foliation | 75     | 70        | N                |
|          |                 |           | J                    | 111      | 318      |                               |               |                 | Bt Gd                    | Mineral foliation | 90     | 70        | N                |
| 264      |                 |           | J                    | 152      | 299      |                               |               |                 | Hb bt gd (fine)          | Mineral foliation | 180    | 60        | S                |
|          |                 |           | J                    | 152      | 299      |                               |               |                 | Hb bt gd (fine)          | Mineral foliation | 174    | 60        | S                |
| 265      |                 |           | J                    | 129      | 279      |                               |               |                 | Bt Gd                    | Mineral foliation | 70     | 70        | S                |
|          |                 |           | J                    | 129      | 279      |                               |               |                 | Bt Gd                    | Mineral foliation | 60     | 70        | S                |
|          |                 |           | J                    | 129      | 279      |                               |               |                 | Bt Gd                    | Mineral foliation | 168    | 70        | E                |
|          |                 |           | J                    | 129      | 279      |                               |               |                 | Bt Gd                    | Mineral foliation | 140    | Uncertain |                  |
| 267      |                 |           | J                    | 143      | 295      |                               |               |                 | Bt Gd                    | Mineral foliation | 150    | Uncertain | S?               |
|          |                 |           | J                    | 143      | 295      |                               |               |                 | Bt Gd                    | Mineral foliation | 125    | 90        | N                |
| 269      |                 |           | J                    | 111      | 294      |                               |               |                 | Bt Gd                    | Mineral foliation | 75     | Uncertain |                  |
| 272      |                 |           | J                    | 094      | 302      |                               |               |                 | Bt Gd                    | Mineral foliation | 65     | 60        | NW               |
| 273      |                 |           | J                    | 094      | 302      |                               |               |                 | Gd                       | Mineral foliation | 68     | 60        | N                |
|          |                 |           | J                    | 094      | 302      |                               |               |                 | Gd                       | Mineral foliation | 62     | 45        | NW               |
|          |                 |           | J                    | 094      | 302      |                               |               |                 | Gd                       | Mineral foliation | 63     | 70        | NW               |
| 274      |                 |           | J                    | 083      | 315      |                               |               |                 | Bt Gd                    | Mineral foliation | 58     | 90        | N                |
|          |                 |           | J                    | 083      | 315      |                               |               |                 | Bt Gd                    | Mineral foliation | 30     | 40        | S                |
|          |                 |           | J                    | 083      | 315      |                               |               |                 | C.rock-Gd                | Contact           | 60     | Uncertain |                  |
|          |                 |           | J                    | 083      | 315      |                               |               |                 | Bt Gd                    | Mineral foliation | 62     | 75        | N                |
|          |                 |           | J                    | 083      | 315      |                               |               |                 | Host rock-Gd             | Contact           | 58     | 75        | N                |
| 280      |                 |           |                      |          |          |                               |               |                 | Bt Gd-fine qtz diorite   | Contact           | 172    | 45        | E                |
|          |                 |           |                      |          |          |                               |               |                 | Bt Gd-fine qtz diorite   | Contact           | 175    | 55        | E                |
|          |                 |           |                      |          |          |                               |               |                 | Fine Qtz diorite         | Mineral foliation | 165    | 70        | E                |
| 281      |                 |           |                      |          |          |                               |               |                 | ?Bt gd                   | Mineral foliation | 147    | 70        | E                |
|          |                 |           |                      |          |          |                               |               |                 | ?Bt gd                   | Mineral foliation | 160    | 90        |                  |
| 300      |                 | J         |                      | 090      | 212      |                               |               |                 | Gd                       | Mineral foliation | 40     | 90        |                  |
| 302      |                 | J         |                      | 092      | 219      |                               |               |                 | Gd                       | Mineral foliation | 45     | 75        | N                |
| 303      |                 | J         |                      | 0905     | 2195     |                               |               |                 | Gd                       | Mineral foliation | 50     | 80        | N                |
|          |                 | J         |                      | 0905     | 2195     |                               |               |                 | Felsic dyke              | Dyke Contact      | 35     | 90        |                  |
| 312      |                 | J         |                      | 0850     | 2350     |                               |               |                 | Granite sheet            | Mineral foliation | 90     | 90        |                  |
| 313      |                 | J         |                      | 059      | 251      |                               |               |                 | Fine Gd-Porphyritic Gd   | Internal Contact  | 25     | 80        | S                |
|          |                 | J         |                      | 059      | 251      |                               |               |                 | Fine Gd sheet            | Mineral foliation | 100    | 75        | N                |
| 314      |                 | J         |                      | 089      | 219      |                               |               |                 | Fine Gd                  | Mineral foliation | 70     | 80        | N                |
| 324      |                 | J         |                      | 0600     | 2385     |                               |               |                 | ?Granite                 | Mineral foliation | 60     | 70        | N                |
| 343      |                 | J         |                      | 020      | 255      |                               |               |                 | Gd                       | Mineral foliation | 30     | 80        | E                |
|          |                 | J         |                      | 020      | 255      |                               |               |                 | Gd                       | Mineral foliation | 45     | 70        | E                |
|          |                 | J         |                      | 020      | 255      |                               |               |                 | ?Gd                      | Shear Zone        | 165    | 55        | NE               |
| 352      |                 | J         |                      | 090      | 257      |                               |               |                 | Medium-Coarse Gd         | Mineral foliation | 102    | 90        |                  |
|          |                 | J         |                      | 090      | 257      |                               |               |                 | Medium-Coarse Gd         | Mineral foliation | 120    | 65        | W                |
|          |                 | J         |                      | 090      | 257      |                               |               |                 | Medium-Coarse Gd         | Mineral foliation | 110    | 75        | N                |
|          |                 | J         |                      | 090      | 257      |                               |               |                 | Dioritic enclave         | Encl. Long axis   | 300    | 5         |                  |
|          |                 | J         |                      | 090      | 257      |                               |               |                 | Dioritic enclave         | Enclave fabric    | 120    | 70        | N                |
| 353      |                 | J         |                      | 092      | 257      |                               |               |                 | Gd                       | Mineral foliation | 120    | 75        | N                |
|          |                 | J         |                      | 0920     | 2585     |                               |               |                 | Gd                       | Mineral foliation | 150    | 75        | E                |
| 361      |                 | J         |                      | 043      | 246      |                               |               |                 | Granite sheet            | Mineral foliation | 70     | 80        | N                |
| 363      |                 | J         |                      | 045      | 248      |                               |               |                 | Granite                  | Mineral foliation | 80     | 75        | N                |
| 365      |                 | J         |                      | 043      | 250      |                               |               |                 | Felsite-h.rock contact   | Other Contact     | 110    | 45        | N                |
|          |                 | J         |                      | 043      | 250      |                               |               |                 | Felsite-h.rock contact   | Other Contact     | 90     | 80        | N                |
| 366      |                 | J         |                      | 041      | 246      |                               |               |                 | Granite                  | Mineral foliation | 72     | 70        | N                |
| 367      |                 | J         |                      | 040      | 245      |                               |               |                 | Granite                  | Mineral foliation | 70     | 75        | N                |
| 370      |                 |           |                      |          |          |                               |               |                 | Lampro dyke              | Mineral foliation | 70     | 90        |                  |
| 371      |                 | J         |                      | 047      | 261      |                               |               |                 | Microgranite             | Vein Orientation  | 60     | 75        | N                |
|          |                 | J         |                      | 047      | 261      |                               |               |                 | Microgranite             | Vein Orientation  | 80     | 15        | N                |
|          |                 | J         |                      | 047      | 261      |                               |               |                 | Coarse Gd                | Mineral foliation | 60     | 60        | S                |
|          |                 | J         |                      | 047      | 261      |                               |               |                 | Coarse Granite           | Mineral foliation | 60     | 90        |                  |
| 93       |                 | J         |                      | 32750    | 46353    | Slieve Croob                  |               |                 | H.rock                   | Bedding           | 60     | 71        | N                |
|          |                 | J         |                      | 32750    | 46353    |                               |               |                 | H.rock                   | Bedding           | 56     | 71        | N                |
|          |                 | J         |                      | 32750    | 46353    |                               |               |                 | H.rock                   | Cleavage          | 64     | 81        | N                |

| Locality |                 |           |                      |         |          | Sample                        |               |                 | Structural data   |                   |        |     |                  |
|----------|-----------------|-----------|----------------------|---------|----------|-------------------------------|---------------|-----------------|-------------------|-------------------|--------|-----|------------------|
| Loc. No. | Hurley Loc. No. | GSNI site | Irish Grid reference |         |          | Locality Name (if applicable) | Sample number | GSNI sample no. | Lithology         | Measurement type  | Strike | Dip | Direction of dip |
|          |                 |           | Grid                 | Easting | Northing |                               |               |                 |                   |                   |        |     |                  |
|          |                 |           | J                    | 32750   | 46353    |                               |               |                 | H.rock            | Cleavage          | 67     | 80  | N                |
|          |                 |           | J                    | 32753   | 46456    |                               |               |                 | H.rock            | Joints            | 155    | 50  | E                |
| 94       |                 |           | J                    | 32067   | 47476    |                               |               |                 | H.rock            | Bedding           | 27     | 78  | E                |
|          |                 |           | J                    | 32067   | 47476    |                               |               |                 | H.rock            | Bedding           | 38     | 80  | E                |
|          |                 |           | J                    | 32067   | 47476    |                               |               |                 | H.rock            | Cleavage          | 10     | 90  |                  |
|          |                 |           | J                    | 32067   | 47476    |                               |               |                 | H.rock            | Cleavage          | 26     | 88  | W                |
| 95       |                 |           | J                    | 33922   | 40588    |                               |               |                 | H.rock            | Bedding           | 172    | 80  | W                |
|          |                 |           |                      |         |          |                               |               |                 | H.rock            | Cleavage          | 5      | 86  | W                |
| 96       |                 |           | J                    | 27717   | 44507    |                               |               |                 | H.rock            | Layering          | 50     | 82  | W                |
| 97       |                 |           | J                    | 25342   | 43429    | Dehomed Mountain              |               |                 | H.rock            | Bedding           | 81     | 84  | N                |
|          |                 |           | J                    | 25342   | 43429    |                               |               |                 | H.rock            | Cleavage          | 86     | 78  | N                |
| 98       |                 |           | J                    | 21646   | 40785    | Shannaghan Hill               |               |                 | H.rock            | Layering          | 55     | 62  | N                |
|          |                 |           | J                    | 21646   | 40785    |                               |               |                 | H.rock            | Cleavage          | 35     | 62  |                  |
| 99       |                 |           | J                    | 32654   | 37445    |                               |               |                 | H.rock            | Layering          | 25     | 83  | E                |
| 100      |                 |           | J                    | 32902   | 37606    |                               |               |                 | H.rock            | Cleavage          | 24     | 87  | E                |
| 101      |                 |           | J                    | 30640   | 33671    |                               |               |                 | H.rock            | Cleavage          | 68     | 33  | S                |
| 102      |                 |           | J                    | 30378   | 33587    |                               |               |                 | H.rock            | Cleavage          | 60     | 53  | S                |
|          |                 |           | J                    | 30378   | 33587    |                               |               |                 | H.rock            | Bedding           | 56     | 36  | S                |
| 103      |                 |           | J                    | 30333   | 33550    |                               |               |                 | H.rock            | Cleavage          | 76     | 58  | S                |
| 104      |                 |           | J                    | 32269   | 32437    |                               |               |                 | H.rock            | Cleavage          | 44     | 72  | S                |
|          |                 |           | J                    | 32269   | 32437    |                               |               |                 | H.rock            | Cleavage          | 62     | 82  | S                |
|          |                 |           | J                    | 32269   | 32437    |                               |               |                 | H.rock            | Bedding           | 65     | 79  | N                |
|          |                 |           | J                    | 24222   | 10663    |                               |               |                 | H.rock            | Cleavage          | 60     | 54  | S                |
| 106      |                 |           | J                    | 21897   | 29020    |                               |               |                 | H.rock            | Bedding           | 95     | 55  | S                |
|          |                 |           | J                    | 21897   | 29020    |                               |               |                 | H.rock            | Bedding           | 96     | 60  | S                |
| 107      |                 |           | J                    | 17543   | 29985    |                               |               |                 | H.rock            | Bedding           | 44     | 56  | SE               |
|          |                 |           | J                    | 17543   | 29985    |                               |               |                 | H.rock            | Bedding           | 73     | 42  | S                |
|          |                 |           | J                    | 17543   | 29985    |                               |               |                 | H.rock            | Joints            | 135    | 76  | N                |
| 108      |                 |           | J                    | 05984   | 33051    |                               |               |                 | H.rock            | Layering          | 20     | 87  | W                |
|          |                 |           | J                    | 05984   | 33051    |                               |               |                 | H.rock            | Cleavage          | 62     | 76  | N                |
| 109      |                 |           | J                    | 05984   | 33051    |                               |               |                 | H.rock            | Cleavage          | 62     | 75  | N                |
|          |                 |           | J                    | 05984   | 33051    |                               |               |                 | H.rock            | Cleavage          | 96     | 66  | N                |
|          |                 |           | J                    | 17305   | 27509    |                               |               |                 | H.rock            | Bedding?          | 74     | 35  | S                |
|          |                 |           | J                    | 17305   | 27509    |                               |               |                 | H.rock            | Bedding?          | 42     | 41  | E                |
| 110      |                 |           | J                    | 14499   | 23330    |                               |               |                 | H.rock            | Bedding           | 63     | 64  | S                |
| 111      |                 |           | J                    | 11454   | 20923    | Clady Quarries                |               |                 | H.rock            | Bedding           | 75     | 65  | S                |
|          |                 |           | J                    | 11454   | 20923    |                               |               |                 | H.rock            | Bedding           | 65     | 55  | S                |
|          |                 |           | J                    | 11454   | 20923    |                               |               |                 | H.rock            | Bedding           | 66     | 79  | S                |
|          |                 |           | J                    | 11484   | 20831    |                               |               |                 | H.rock            | Bedding           | 56     | 50  | S                |
|          |                 |           | J                    | 11484   | 20831    |                               |               |                 | H.rock            | Joints            | 152    | 62  | E                |
|          |                 |           | J                    | 11484   | 20831    |                               |               |                 | H.rock            | Joints            | 130    | 90  |                  |
|          |                 |           | J                    | 11484   | 20831    |                               |               |                 | H.rock            | Joints            | 157    | 88  | E                |
|          |                 |           | J                    | 11484   | 20831    |                               |               |                 | H.rock            | Joints            | 57     | 89  | N                |
| 113      |                 |           | J                    | 00816   | 25831    |                               |               | Bt granite      |                   |                   |        |     |                  |
|          |                 |           | J                    | 00816   | 25794    |                               |               | Bt granite      | Mineral foliation | 49                | 74     |     |                  |
| 114      |                 | H         | 99905                | 25529   | Belleeks |                               |               |                 | H.rock            | Bedding           | 75     | 71  | S                |
|          |                 | H         | 99905                | 25529   |          |                               |               |                 | H.rock            | Bedding           | 80     | 85  | S                |
|          |                 | H         | 99905                | 25529   |          |                               |               |                 | H.rock            | Cleavage          | 68     | 70  | S                |
| 115      |                 |           | H                    | 87201   | 17978    |                               |               |                 | H.rock            | Bedding           | 37     | 83  | W                |
| 116      |                 |           | H                    | 89175   | 16171    |                               |               |                 | H.rock            | Bedding           | 45     | 88  | S                |
|          |                 |           | H                    | 89175   | 16171    |                               |               |                 | H.rock            | Cleavage          | 50     | 89  | S                |
| 117      |                 |           | H                    | 95811   | 16604    |                               |               |                 | H.rock            | Bedding?          | 61     | 66  | S                |
|          |                 |           | H                    | 95811   | 16604    |                               |               |                 | H.rock            | Bedding?          | 31     | 46  | SE               |
| 118      |                 |           | H                    | 95640   | 16390    |                               |               |                 | H.rock            | Bedding           | 44     | 62  | S                |
|          |                 |           | H                    | 95640   | 16390    |                               |               |                 | H.rock            | Joints            | 131    | 90  |                  |
| 119      |                 |           | H                    | 97125   | 15450    | Silverbridge                  |               |                 | H.rock            | Bedding           | 70     | 77  | S                |
| 120      |                 |           | H                    | 97179   | 16046    |                               |               |                 | H.rock            | Bedding           | 45     | 85  | S                |
| 121      |                 |           | H                    | 96256   | 18766    |                               |               |                 | H.rock            | Bedding           | 40     | 60  | E                |
|          |                 |           | H                    | 96617   | 19941    |                               |               |                 | H.rock            | Bedding           | 2      | 80  | E                |
|          |                 |           | H                    | 96617   | 19941    |                               |               |                 | H.rock            | Bedding           | 1      | 78  | W                |
|          |                 |           | H                    | 96617   | 19941    |                               |               |                 | H.rock            | Cleavage          | 170    | 77  | E                |
|          |                 |           | H                    | 96627   | 19977    |                               |               |                 | H.rock            | Bedding           | 12     | 81  | W                |
| 123      |                 |           | H                    | 99768   | 19007    |                               |               |                 | Granite           |                   |        |     |                  |
| 124      |                 |           | H                    | 99325   | 21884    |                               |               |                 | Hb granite        | Mineral foliation | 10     | 86  | E                |
| 125      |                 |           | H                    | 99618   | 20916    |                               |               |                 | Granite           | Mineral foliation | 12     | 74  | E                |
| 126      |                 |           | H                    | 99814   | 20625    |                               |               |                 | Bt hb granite     | Mineral foliation | 144    | 90  |                  |
| 127      |                 |           | J                    | 00603   | 22068    |                               |               |                 | Granite sheet     | Sheet contact     | 132    | 72  | E                |
| 128      |                 |           | J                    | 03496   | 15196    |                               |               |                 | Coarse hb bt gd   |                   |        |     |                  |
| 129      |                 |           | J                    | 15951   | 35423    |                               |               |                 | Hb gd             |                   |        |     |                  |
| 130      |                 |           | J                    | 24050   | 40540    |                               |               |                 | Gd                |                   |        |     |                  |
| 131      |                 |           | J                    | 13942   | 32488    |                               |               |                 | Coarse felsic gd  |                   |        |     |                  |
| 132      |                 |           | J                    | 07948   | 23878    | Upper Motorway Terrace        |               |                 | Granite vein      | Vein orientation  | 126    | 54  | E                |
|          |                 |           | J                    | 07948   | 23878    |                               |               |                 | Granite vein      | Vein orientation  | 43     | 74  | E                |
|          |                 |           | J                    | 07884   | 23980    |                               |               |                 | Granite vein      | Vein orientation  | 142    | 48  | W                |
|          |                 |           | J                    | 07878   | 24007    |                               |               |                 | Granite vein      | Vein orientation  | 130    | 44  | W                |
|          |                 |           | J                    | 07832   | 24070    |                               |               |                 | Gd                | Mineral foliation | 120    | 56  | SW               |
| 133      |                 |           | J                    | 08084   | 23274    |                               |               |                 | Gd                |                   |        |     |                  |
| 134      |                 |           | J                    | 08146   | 24933    |                               |               |                 | Porphyritic di/gd | Mineral foliation | 120    | 32  | N                |
| 135      |                 |           | J                    | 06759   | 29353    |                               |               |                 | Gd                |                   |        |     |                  |
| 136      |                 |           | J                    | 06115   | 29961    |                               |               |                 | Gd                |                   |        |     |                  |
| 137      |                 |           | J                    | 05838   | 32039    |                               |               |                 | Bt gd             | Mineral foliation | 44     | 31  | E                |
| 138      |                 |           | J                    | 08198   | 31500    |                               |               |                 | Coarse gd         |                   |        |     |                  |
| 139      |                 |           | J                    | 14094   | 27815    |                               |               |                 | Bt gd             | Mineral foliation | 33     | 90  |                  |
| 140      |                 |           | J                    | 30532   | 43634    |                               |               |                 | Fine hb bt gd     | Mineral foliation | 116    | 40  | N                |
|          |                 |           | J                    | 30558   | 43673    |                               |               |                 | Fine hb bt gd     | Mineral foliation | 99     | 85  | N                |
|          |                 |           | J                    | 30527   | 43684    |                               |               |                 | Fine hb bt gd     | Mineral foliation | 114    | 85  | S                |
|          |                 |           | J                    | 30527   | 43684    |                               |               |                 | Fine hb bt gd     | Mineral foliation | 111    | 47  | S                |
| 141      |                 |           | J                    | 30611   | 43794    |                               |               |                 | Mafic gd?         |                   |        |     |                  |
| 142      |                 |           | J                    | 27609   | 43221    |                               |               |                 | Gd-h.rock         | Contact           | 342    | 30  | W                |



| Locality |                 |           |                      |         |          | Sample                        |               |                 | Structural data      |                   |        |           |                  |
|----------|-----------------|-----------|----------------------|---------|----------|-------------------------------|---------------|-----------------|----------------------|-------------------|--------|-----------|------------------|
| Loc. No. | Hurley Loc. No. | GSNI site | Irish Grid reference |         |          | Locality Name (if applicable) | Sample number | GSNI sample no. | Lithology            | Measurement type  | Strike | Dip       | Direction of dip |
|          |                 |           | Grid                 | Easting | Northing |                               |               |                 |                      |                   |        |           |                  |
| 143      |                 |           | J                    | 27874   | 43566    |                               |               |                 | Hb bt gd             | Mineral foliation | 69     | 45        | N                |
|          |                 |           | J                    | 27874   | 43566    |                               |               |                 | Hb bt gd             | Mineral foliation | 80     | 73        | N                |
|          |                 |           | J                    | 27874   | 43566    |                               |               |                 | Hb bt gd             | Mineral foliation | 90     | 51        | N                |
|          |                 |           | J                    | 27879   | 43583    |                               |               |                 | Qtz diorite?         | Mineral foliation | 59     | 85        | N                |
|          |                 |           | J                    | 27879   | 43583    |                               |               |                 | Qtz diorite-Gd       | Internal contact? | 127    | 75        | S                |
|          |                 |           | J                    | 27879   | 43583    |                               |               |                 | Hb bt gd             | Mineral foliation | 74     | 84        | N                |
| 144      |                 |           | J                    | 24883   | 41627    |                               |               |                 | Hb bt gd             | Mineral foliation | 80     | 90        |                  |
|          |                 |           | J                    | 24883   | 41627    |                               |               |                 | Qtz diorite?         | Mineral foliation |        |           |                  |
| 145      |                 |           | J                    | 32237   | 37392    |                               |               |                 | Gd                   |                   |        |           |                  |
| 146      |                 |           | J                    | 32502   | 37717    |                               |               |                 | Qtz diorite?         |                   |        |           |                  |
| 147      |                 |           | J                    | 32865   | 37627    |                               |               |                 | Felsite              |                   |        |           |                  |
| 148      |                 |           | J                    | 26357   | 33953    |                               |               |                 | Hb gd                | Mineral foliation | 74     | 72        | S                |
|          |                 |           | J                    | 26357   | 33953    |                               |               |                 | C.rock (xenolith)    | Bedding (xeno)    | 178    | 77        | E                |
|          |                 |           | J                    | 26357   | 33953    |                               |               |                 | Qtz vein             | Vein Orientation  | 166    | 55        | W                |
| 149      |                 |           | J                    | 25991   | 36580    |                               |               |                 | Bt hb gd             |                   |        |           |                  |
| 150      |                 |           | J                    | 03650   | 24593    | Camlough Quarry               |               |                 | C.rock               | Bedding           | 42     | 58        | N                |
|          |                 |           | J                    | 03650   | 24593    |                               |               |                 | C.rock               | Bedding           | 74     | 70        | N                |
|          |                 |           | J                    | 03650   | 24593    |                               |               |                 | C.rock               | Bedding           | 62     | 85        | S                |
|          |                 |           | J                    | 03650   | 24593    |                               |               |                 | Granite sheet-h.rock | Contact           | 80     | 67        | N                |
|          |                 |           | J                    | 03650   | 24593    |                               |               |                 | Granite              | Mineral foliation | 168    | 10        | E                |
|          |                 |           | J                    | 03650   | 24593    |                               |               |                 | Granite vein         | Vein Orientation  | 63     | 75        | N                |
|          |                 |           | J                    | 03650   | 24593    |                               |               |                 | Palaeogene-h.rock    | Contact           | 109    | 50        | N                |
|          |                 |           | J                    | 03650   | 24593    |                               |               |                 | H.rock               | Bedding           | 110    | 76        | N                |
| 151      |                 |           | J                    | 32408   | 42359    |                               |               |                 | Melodi               | Mineral foliation | 164    | 73        | E                |
|          |                 |           | J                    | 32408   | 42359    |                               |               |                 | Melodi               | Mineral foliation | 35     | 65        | SE               |
|          |                 |           | J                    | 32492   | 42303    |                               |               |                 | Gd vein              | Vein Orientation  | 56     | 74        | S                |
|          |                 |           | J                    | 32536   | 42261    |                               |               |                 | Meladi               | Mineral foliation | 20     | 80        | E                |
|          |                 |           | J                    | 32536   | 42261    |                               |               |                 | Meladi               | Mineral foliation | 5      | 75        | E                |
|          |                 |           | J                    | 32536   | 42261    |                               |               |                 | Basalt vein          |                   |        |           |                  |
|          |                 |           | J                    | 32536   | 42261    |                               |               |                 | Basalt vein          |                   |        |           |                  |
| 152      |                 |           | J                    | 32829   | 41980    |                               |               |                 | Melodiorite          | Mineral foliation | 170    | 81        | W                |
| 153      |                 |           | J                    | 32789   | 42034    |                               |               |                 | Gd vein              | Vein orientation  | 38     | 65        | NW               |
| 154      |                 |           | J                    | 32473   | 42278    |                               |               |                 | Granite vein         | Vein orientation  | 62     | 65        | SE               |
|          |                 |           | J                    | 32473   | 42278    |                               |               |                 | Granite sheet        | Sheet orientation | 51     | 70        | SE               |
| 155      |                 |           | J                    | 30430   | 35436    |                               |               |                 | Pegmatite-gd         | Contact           | 170    | 60        | E                |
|          |                 |           | J                    | 30430   | 35436    |                               |               |                 | Gd                   | Mineral foliation | 35     | 86        | SE               |
| 156      |                 |           | J                    | 31243   | 35029    |                               |               |                 | Infilled fractures?  | Fractures         | 148    | 88        | NE               |
|          |                 |           | J                    | 31243   | 35029    |                               |               |                 | Infilled fractures?  | Fractures         | 152    | 87        | NE               |
|          |                 |           | J                    | 31243   | 35029    |                               |               |                 | H.rock               | Bedding           | 50     | 50        | SE               |
|          |                 |           | J                    | 31243   | 35029    |                               |               |                 | H.rock               | Bedding           | 38     | 62        | SE               |
|          |                 |           | J                    | 31243   | 35029    |                               |               |                 | Qtz porphyry-c.rock  | Contact           | 85     | 37        | N                |
|          |                 |           | J                    | 31243   | 35029    |                               |               |                 |                      | Bedding           | 24     | 60        | SE               |
| 157      |                 |           | J                    | 14608   | 25140    | Aughnagon Quarry (2)          |               |                 | H.rock               | Bedding           | 25     | 69        | E                |
|          |                 |           | J                    | 14608   | 25140    |                               |               |                 | Infilled fractures?  | Fractures         | 126    | 81        | NE               |
|          |                 |           | J                    | 14423   | 25143    |                               |               |                 | Gd-h.rock            | Contact           | 55     | 42        | SE               |
|          |                 |           | J                    | 14423   | 25143    |                               |               |                 | H.rock               | Bedding           | 55     | 42        | SE               |
|          |                 |           | J                    | 14423   | 25143    |                               |               |                 | Gd                   | Mineral foliation | 48     | 80        | SE               |
|          |                 |           | J                    | 14423   | 25143    |                               |               |                 | Gd                   | Mineral foliation | 56     | 82        | SE               |
| 158      |                 |           | J                    | 11221   | 27100    |                               |               |                 | Bt hb gd             |                   |        |           |                  |
| 159      |                 |           | J                    | 29924   | 44702    |                               |               |                 | Coarse bt hb gd      |                   |        |           |                  |
|          | 306             |           | J                    | 08600   | 23600    | Dublin Road Bridge            |               |                 | H.rock               | Bedding           | 120    | Uncertain | N                |
|          | 307             |           | J                    | 09000   | 24000    |                               |               |                 | H.rock               | Bedding           | 80     | 80        | S                |
|          | 308             |           | J                    | 08800   | 23800    |                               |               |                 | H.rock               | Cleavage          | 110    | 80        | N                |
|          | 308             |           | J                    | 08800   | 23800    |                               |               |                 | H.rock               | Bedding           | 112    | 80        | N                |
|          | 310             |           | J                    | 08150   | 24100    |                               |               |                 | H.rock               | Cleavage          | 50     | 60        | S                |
|          | 310             |           | J                    | 08150   | 24100    |                               |               |                 | H.rock               | Bedding           | 50     | 50        | S                |
|          | 311             |           | J                    | 08250   | 24050    |                               |               |                 | H.rock               | Bedding           | 142    | 80        | NE               |
|          | 311             |           | J                    | 08250   | 24050    |                               |               |                 | H.rock               | Bedding           | 140    | 80        | N                |
|          | 311             |           | J                    | 08250   | 24050    |                               |               |                 | H.rock               | Bedding           | 135    | 75        | N                |
|          | 311             |           | J                    | 08250   | 24050    |                               |               |                 | H.rock               | Bedding           | 140    | 75        | NE               |
|          | 311             |           | J                    | 08250   | 24050    |                               |               |                 | H.rock               | Bedding           | 135    | 50        | NE               |
|          | 311             |           | J                    | 08250   | 24050    |                               |               |                 | H.rock               | Bedding           | 140    | 75        | NE               |
|          | 311             |           | J                    | 08250   | 24050    |                               |               |                 | H.rock               | Bedding           | 5      | 39        | NW               |
|          | 311             |           | J                    | 08250   | 24050    |                               |               |                 | H.rock               | Cleavage          | 100    | 80        | N                |
|          | 312             |           | J                    | 08500   | 23500    |                               |               |                 | H.rock               | Bedding           | 90     | 80        | N                |
|          | 312             |           | J                    | 08500   | 23500    |                               |               |                 | H.rock               | Cleavage          | 90     | 85        | N                |
